# Supplementary material
Source: Springer Nature journal article supplement (https://www.springermedizin.de/resource/supplementary/12889_2014_7042_MOESM2_ESM.pdf/9499600)

Ghana

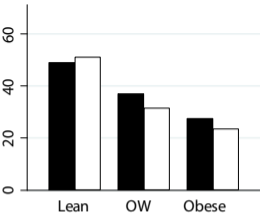

South Africa

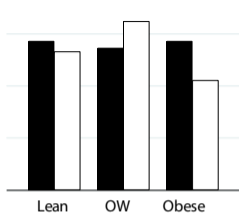

Jamaica

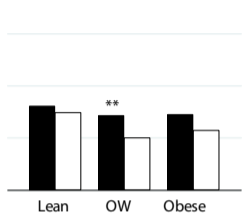

Seychelles

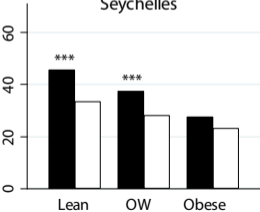

USA

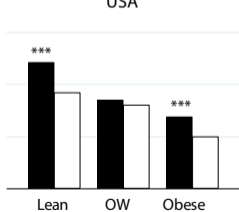

■ MVPA weekdays (min/d)

□ MVPA weekend days (min/d)

Supplement: MOESM2 [file 9499600]
